# Supplementary material for: Photoelectrochemical oxidation of p-nitrophenol on an expanded graphite—TiO2 electrode
Source: Royal Society of Chemistry journal article supplement (doi:10.1039/c3pp25398h), 2013-03-27
Supplement: c3pp25398h.pdf [file c3pp25398h.pdf]

## Photoelectrochemical Oxidation of *p*-Nitrophenol on Expanded Graphite-TiO<sub>2</sub> Electrode.

*B. Ntsendwana*<sup>1</sup>, *S.Sampath*<sup>1,2</sup>, *B.B. Mamba*<sup>1</sup>, *O.A. Arotiba*<sup>1,\*</sup>

<sup>1</sup> Department of Applied Chemistry, University of Johannesburg, P.O. Box 17011, Doornfontein, 2028, South Africa.

<sup>2</sup> Department of Inorganic and Physical Chemistry, Indian Institute of Science, Bangalore, 560012, India

\*E-mail: [oarotiba@uj.ac.za](mailto:oarotiba@uj.ac.za)

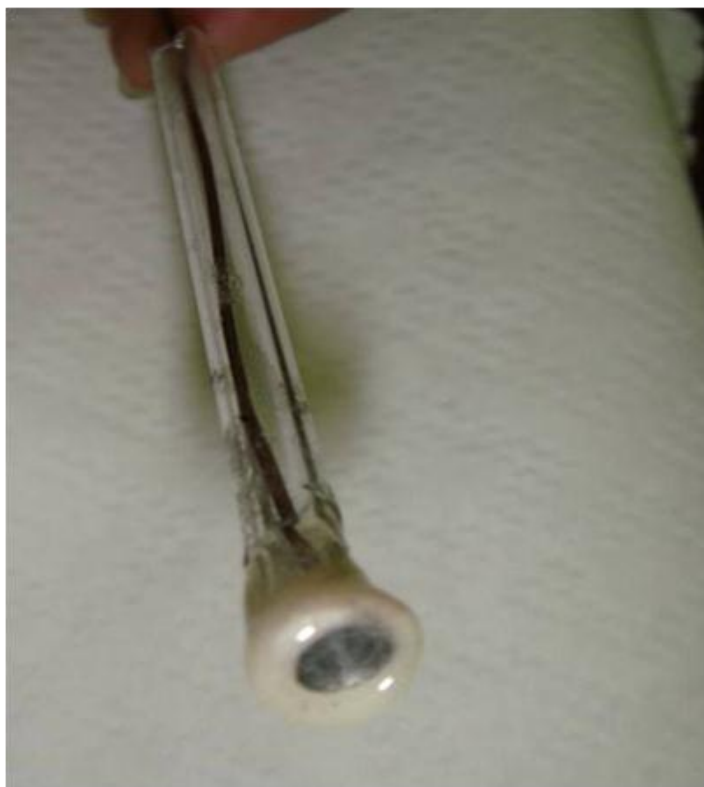

A picture of exfoliated graphite electrode
